# Supplementary material
Source: PubMed Central journal article supplement (PMC8561432)
Supplement: jama-e2119623-s001.pdf [file jama-e2119623-s001.pdf]

## Supplemental Online Content

Abu-Raddad LJ, Chemaitelly H, Ayoub HH, et al. Association of prior SARS-CoV-2 infection with risk of breakthrough infection following mRNA vaccination in Qatar. *JAMA*. doi:10.1001/jama.2021.19623

### eMethods

**eTable 1.** Demographic Characteristics of Cohorts That Received the BNT162b2 and mRNA-1273 Vaccines

**eTable 2.** Demographic Characteristics of Breakthrough-Infected and Breakthrough-Uninfected Vaccinated Individuals in the Matched Cohorts

**eFigure 1.** Time Trend of Cumulative Numbers of BNT162b2-Vaccinated and mRNA-1273-Vaccinated Persons Included in This Study and Numbers of Daily Diagnosed SARS-CoV-2 Infections During the Study Period

**eFigure 2.** Cumulative Infection Incidence Among Matched Cohorts of BNT162b2- and mRNA-1273-Vaccinated Individuals With and Without a Prior Infection

**eFigure 3.** Development of Cohorts With Prior Infections  $\geq 6$  Months Versus  $< 6$  Months Before the First Vaccine Dose in a Study of SARS-CoV-2 Infections After Vaccination

**eFigure 4.** Cumulative Infection Incidence Among Individuals With a Prior Infection by Time Interval Between Prior Infection and Vaccination

### eReferences

This supplemental material has been provided by the authors to give readers additional information about their work.

## **eMethods.**

### **Definitions of Severe, Critical, and Fatal COVID-19**

Severe COVID-19 was defined per the World Health Organization (WHO) classification as a severe acute respiratory syndrome coronavirus 2 (SARS-CoV-2)-infected person with “oxygen saturation of <90% on room air, and/or respiratory rate of >30 breaths/minute in adults and children >5 years old (or  $\geq 60$  breaths/minute in children <2 months old or  $\geq 50$  breaths/minute in children 2-11 months old or  $\geq 40$  breaths/minute in children 1–5 years old), and/or signs of severe respiratory distress (accessory muscle use and inability to complete full sentences, and, in children, very severe chest wall indrawing, grunting, central cyanosis, or presence of any other general danger signs)”.<sup>1</sup> Detailed WHO criteria for classifying SARS-CoV-2 infection severity can be found in the WHO technical report.<sup>1</sup>

Critical COVID-19 was defined per WHO classification as a SARS-CoV-2-infected person with “acute respiratory distress syndrome, sepsis, septic shock, or other conditions that would normally require the provision of life sustaining therapies such as mechanical ventilation (invasive or non-invasive) or vasopressor therapy”.<sup>1</sup> Detailed WHO criteria for classifying SARS-CoV-2 infection criticality can be found in the WHO technical report.<sup>1</sup>

COVID-19 death was defined per WHO classification as “a death resulting from a clinically compatible illness, in a probable or confirmed COVID-19 case, unless there is a clear alternative cause of death that cannot be related to COVID-19 disease (e.g. trauma). There should be no period of complete recovery from COVID-19 between illness and death. A death due to COVID-19 may not be attributed to another disease (e.g. cancer) and should be counted independently of preexisting conditions that are suspected of triggering a severe course of COVID-19”. Detailed WHO criteria for classifying COVID-19 death can be found in the WHO technical report.<sup>2</sup>

## **Laboratory methods**

Nasopharyngeal and/or oropharyngeal swabs were collected for PCR testing and placed in Universal Transport Medium (UTM). Aliquots of UTM were: extracted on a QIAasymphony platform (QIAGEN, USA) and tested with real-time reverse-transcription PCR (RT-qPCR) using TaqPath™ COVID-19 Combo Kits (Thermo Fisher Scientific, USA) on an ABI 7500 FAST (Thermo Fisher, USA); tested directly on the Cepheid GeneXpert system using the Xpert Xpress SARS-CoV-2 (Cepheid, USA); or loaded directly into a Roche cobas® 6800 system and assayed with a cobas® SARS-CoV-2 Test (Roche, Switzerland). The first assay targets the viral S, N, and ORF1ab gene regions. The second targets the viral N and E-gene regions, and the third targets the ORF1ab and E-gene regions.

All PCR testing was conducted at the Hamad Medical Corporation Central Laboratory or Sidra Medicine Laboratory, following standardized protocols.

## **Classification of infections by variant type**

Surveillance for SARS-CoV-2 variants in Qatar is based on viral genome sequencing and multiplex, real-time reverse-transcription PCR (RT-qPCR) variant screening<sup>3</sup> of random positive clinical samples,<sup>4-8</sup> and complemented by deep sequencing of wastewater samples.<sup>6,9</sup> The latter is used to compare the distribution of variants in wastewater with that in clinical samples collected from SARS-CoV-2 patients.

Between March 23, 2021 and September 7, 2021, RT-qPCR genotyping identified 6005 (35.5%) Beta (B.1.351)-like cases, 3658 (21.6%) Alpha (B.1.1.7)-like cases, 7218 (42.6%) “other” variant cases, and 51 (0.3%) B.1.375-like or B.1.258-like cases in 16 932 randomly collected

SARS-CoV-2-positive specimens.<sup>6,8</sup> Since RT-qPCR genotyping started on March 23, 2021, the proportion of all diagnosed infections in Qatar that have been RT-qPCR genotyped was 12.0%.

The accuracy of the RT-qPCR genotyping was verified against either Sanger sequencing of the receptor-binding domain (RBD) of SARS-CoV-2 surface glycoprotein (S) gene, or by viral whole-genome sequencing on a Nanopore GridION sequencing device. From 236 random samples (27 Alpha-like, 186 Beta-like, and 23 “other” variants), PCR genotyping results for Alpha-like, Beta-like, and ‘other’ variants were in 88.8% (23 out of 27), 99.5% (185 out of 186), and 100% (23 out of 23) agreement with the SARS-CoV-2 lineages assigned by sequencing.

Within the “other” variant category, Sanger sequencing and/or Illumina sequencing of the RBD of SARS-CoV-2 spike gene on 728 random samples confirmed that 701 (96.3%) were Delta cases and 17 (2.3%) were other variant cases, with 10 (1.4%) samples failing lineage assignment.<sup>6,8</sup> Accordingly, a Delta case was proxied as any “other” case identified through the RT-qPCR based variant screening.

All the variant RT-qPCR screening was conducted at the Sidra Medicine Laboratory following standardized protocols.

**eTable 1. Demographic characteristics of cohorts that received the BNT162b2 and mRNA-1273 vaccines.**

| Characteristics                            | Individuals with a prior PCR-confirmed infection |                                       |                   | Individuals with no prior PCR-confirmed infection |                                       |                    |
|--------------------------------------------|--------------------------------------------------|---------------------------------------|-------------------|---------------------------------------------------|---------------------------------------|--------------------|
|                                            | Full cohort vaccinated with BNT162b2             | Full cohort vaccinated with mRNA-1273 | SMD <sup>a</sup>  | Full cohort vaccinated with BNT162b2              | Full cohort vaccinated with mRNA-1273 | SMD <sup>a</sup>   |
| <b>No</b>                                  | 100 486                                          | 58 987                                |                   | 787 821                                           | 426 574                               |                    |
| <b>Total follow-up time (person-weeks)</b> | 1 608 209                                        | 694 259                               |                   | 13 948 047                                        | 5 482 776                             |                    |
| <b>Median age (IQR) — years</b>            | 37 (29-44)                                       | 36 (31-44)                            | 0.09 <sup>b</sup> | 37 (29-46)                                        | 36 (31-44)                            | 0.004 <sup>b</sup> |
| <b>Age group — no. (%)</b>                 |                                                  |                                       | 0.44              |                                                   |                                       | 0.48               |
| <20 years                                  | 10 257 (10.2)                                    | 545 (0.9)                             |                   | 83 043 (10.5)                                     | 4 975 (1.2)                           |                    |
| 20-29 years                                | 15 020 (15.0)                                    | 10 189 (17.3)                         |                   | 114 120 (14.5)                                    | 78 841 (18.5)                         |                    |
| 30-39 years                                | 35 567 (36.4)                                    | 24 973 (42.3)                         |                   | 262 939 (33.4)                                    | 172 736 (40.5)                        |                    |
| 40-49 years                                | 23 193 (23.1)                                    | 15 618 (26.5)                         |                   | 183 444 (23.3)                                    | 115 286 (27.0)                        |                    |
| 50-59 years                                | 10 802 (10.8)                                    | 6079 (10.3)                           |                   | 93 616 (11.9)                                     | 43 817 (10.3)                         |                    |
| 60-69 years                                | 3683 (3.7)                                       | 1328 (2.3)                            |                   | 38 760 (4.9)                                      | 9082 (2.1)                            |                    |
| 70+ years                                  | 964 (1.0)                                        | 255 (0.4)                             |                   | 11 899 (1.5)                                      | 1837 (0.4)                            |                    |
| <b>Sex</b>                                 |                                                  |                                       | 0.10              |                                                   |                                       | 0.15               |
| Male                                       | 68 186 (67.9)                                    | 42 653 (72.3)                         |                   | 505 040 (64.1)                                    | 302 456 (70.9)                        |                    |
| Female                                     | 32 300 (32.1)                                    | 16 334 (27.7)                         |                   | 282 781 (35.9)                                    | 124 118 (29.1)                        |                    |
| <b>Nationality<sup>c</sup></b>             |                                                  |                                       | 0.52              |                                                   |                                       | 0.55               |
| Bangladeshi                                | 8009 (8.0)                                       | 6504 (11.0)                           |                   | 70 622 (9.0)                                      | 61 115 (14.3)                         |                    |
| Egyptian                                   | 6340 (6.3)                                       | 3432 (5.8)                            |                   | 51 232 (6.5)                                      | 25 629 (6.0)                          |                    |
| Filipino                                   | 10 484 (10.4)                                    | 7922 (13.4)                           |                   | 78 927 (10.0)                                     | 53 292 (12.5)                         |                    |
| Indian                                     | 24 560 (24.4)                                    | 18 432 (31.3)                         |                   | 171 630 (21.8)                                    | 120 516 (28.3)                        |                    |
| Nepalese                                   | 8180 (8.1)                                       | 5817 (9.9)                            |                   | 42 358 (5.4)                                      | 33 972 (8.0)                          |                    |
| Pakistani                                  | 4133 (4.1)                                       | 3184 (5.4)                            |                   | 28 897 (3.7)                                      | 21 009 (4.9)                          |                    |
| Qatari                                     | 16 943 (16.9)                                    | 1652 (2.8)                            |                   | 136 882 (17.4)                                    | 12 564 (3.0)                          |                    |
| Sri Lankan                                 | 2988 (3.0)                                       | 2565 (4.4)                            |                   | 21 653 (2.8)                                      | 18 631 (4.4)                          |                    |
| Sudanese                                   | 2545 (2.5)                                       | 1341 (2.3)                            |                   | 17 812 (2.3)                                      | 8729 (2.1)                            |                    |
| Other nationalities <sup>d</sup>           | 16 304 (16.2)                                    | 8138 (13.8)                           |                   | 167 808 (21.3)                                    | 71 117 (16.7)                         |                    |
| <b>Calendar month of Dose 1</b>            |                                                  |                                       | 0.72              |                                                   |                                       | 0.88               |
| December                                   | 215 (0.2)                                        | 0 (0.0)                               |                   | 5304 (0.7)                                        | 2 (0.0005)                            |                    |
| January                                    | 3114 (3.1)                                       | 0 (0.0)                               |                   | 42 296 (5.4)                                      | 14 (0.003)                            |                    |
| February                                   | 9613 (9.6)                                       | 88 (0.2)                              |                   | 115 107 (14.6)                                    | 851 (0.2)                             |                    |
| March                                      | 17 727 (17.6)                                    | 8301 (14.1)                           |                   | 184 279 (23.4)                                    | 83 474 (19.6)                         |                    |
| April                                      | 19 988 (19.9)                                    | 16 539 (28.0)                         |                   | 148 557 (18.9)                                    | 142 424 (33.4)                        |                    |
| May                                        | 33 681 (33.5)                                    | 14 833 (25.2)                         |                   | 186 681 (23.7)                                    | 80 726 (18.9)                         |                    |
| June                                       | 10 256 (10.2)                                    | 7892 (13.4)                           |                   | 69 866 (8.9)                                      | 46 696 (11.0)                         |                    |
| July                                       | 4380 (4.4)                                       | 9154 (15.5)                           |                   | 26 589 (3.4)                                      | 57 672 (13.5)                         |                    |
| August                                     | 1512 (1.5)                                       | 2180 (3.7)                            |                   | 9142 (1.2)                                        | 14 715 (3.5)                          |                    |

Abbreviations: IQR, interquartile range; SMD, standardized mean difference.

<sup>a</sup>SMD is the difference in the mean of a covariate between groups divided by the pooled standard deviation. An SMD less than 0.1 indicates adequate matching.

<sup>b</sup>SMD reported here is for the mean difference between groups divided by the pooled standard deviation.

<sup>c</sup>Nationalities were chosen to represent the most numerous groups in the population of Qatar.

<sup>4</sup>Individuals with a prior PCR-confirmed infection in Qatar comprised 133 other nationalities in the full cohort of individuals who received the BNT162b2 vaccine and 114 other nationalities in the full cohort of individuals who received the mRNA-1273 vaccine. Meanwhile, individuals with no prior PCR-confirmed infection in Qatar comprised 184 other nationalities in the full cohort of individuals who received the BNT162b2 vaccine and 163 other nationalities in the full cohort of individuals who received the mRNA-1273 vaccine.

**eTable 2. Demographic characteristics of breakthrough-infected and breakthrough-uninfected vaccinated individuals in the matched cohorts.**

| Characteristics                                            | Vaccinated with BNT162b2                                      |                |                   |                                                                |                |                   | Vaccinated with mRNA-1273                                     |                |                   |                                                                |                |                   |
|------------------------------------------------------------|---------------------------------------------------------------|----------------|-------------------|----------------------------------------------------------------|----------------|-------------------|---------------------------------------------------------------|----------------|-------------------|----------------------------------------------------------------|----------------|-------------------|
|                                                            | Individuals with a prior PCR-confirmed infection <sup>a</sup> |                |                   | Individuals with no prior PCR-confirmed infection <sup>a</sup> |                |                   | Individuals with a prior PCR-confirmed infection <sup>a</sup> |                |                   | Individuals with no prior PCR-confirmed infection <sup>a</sup> |                |                   |
|                                                            | Reinfected                                                    | Not reinfected | SMD <sup>b</sup>  | Infected                                                       | Not infected   | SMD <sup>b</sup>  | Reinfected                                                    | Not reinfected | SMD <sup>b</sup>  | Infected                                                       | Not infected   | SMD <sup>b</sup>  |
| No                                                         | 159                                                           | 99 067         |                   | 2509                                                           | 287 923        |                   | 43                                                            | 58 053         |                   | 368                                                            | 169 146        |                   |
| Median time ≥14 days from Dose 2 to infection (IQR) — days | 55 (18-108)                                                   |                |                   | 60 (25-113)                                                    |                |                   | 46 (16-81)                                                    |                |                   | 77 (30-104)                                                    |                |                   |
| Median age (IQR) — years                                   | 35 (28-43)                                                    | 37 (29-44)     | 0.08 <sup>c</sup> | 38 (31-48)                                                     | 37 (29-44)     | 0.22 <sup>c</sup> | 39 (32-46)                                                    | 36 (31-44)     | 0.15 <sup>c</sup> | 36 (31-44)                                                     | 36 (31-44)     | 0.03 <sup>c</sup> |
| Age group — no. (%)                                        |                                                               |                | 0.34              |                                                                |                | 0.28              |                                                               |                | 0.25              |                                                                |                | 0.08              |
| <20 years                                                  | 7 (4.4)                                                       | 10 151 (10.3)  |                   | 136 (5.4)                                                      | 29 755 (10.3)  |                   | 0 (0.0)                                                       | 512 (0.9)      |                   | 4 (1.1)                                                        | 1357 (0.8)     |                   |
| 20-29 years                                                | 38 (23.9)                                                     | 14 766 (14.9)  |                   | 422 (16.8)                                                     | 42 774 (14.9)  |                   | 7 (16.3)                                                      | 10 045 (17.3)  |                   | 71 (19.3)                                                      | 29 375 (17.4)  |                   |
| 30-39 years                                                | 59 (37.1)                                                     | 36 256 (36.6)  |                   | 833 (33.2)                                                     | 106 625 (37.0) |                   | 16 (37.2)                                                     | 24 755 (42.6)  |                   | 147 (40.0)                                                     | 72 866 (43.1)  |                   |
| 40-49 years                                                | 35 (22.0)                                                     | 22 885 (23.1)  |                   | 556 (22.2)                                                     | 66 334 (23.0)  |                   | 12 (27.9)                                                     | 15 428 (26.6)  |                   | 97 (26.4)                                                      | 44 937 (26.6)  |                   |
| 50-59 years                                                | 14 (8.8)                                                      | 10 565 (10.7)  |                   | 334 (13.3)                                                     | 30 099 (10.5)  |                   | 7 (16.3)                                                      | 5911 (10.2)    |                   | 40 (10.9)                                                      | 16 875 (10.0)  |                   |
| 60-69 years                                                | 6 (3.8)                                                       | 3547 (3.6)     |                   | 176 (7.0)                                                      | 9895 (3.4)     |                   | 1 (2.3)                                                       | 1205 (2.1)     |                   | 8 (2.2)                                                        | 3251 (1.9)     |                   |
| 70+ years                                                  | 0 (0.0)                                                       | 897 (0.9)      |                   | 52 (2.1)                                                       | 2441 (0.9)     |                   | 0 (0.0)                                                       | 197 (0.3)      |                   | 1 (0.3)                                                        | 485 (0.3)      |                   |
| Sex                                                        |                                                               |                | 0.02              |                                                                |                | 0.14              |                                                               |                | 0.15              |                                                                |                | 0.22              |
| Male                                                       | 107 (67.3)                                                    | 67 413 (68.1)  |                   | 1547 (61.7)                                                    | 196 809 (68.4) |                   | 34 (79.1)                                                     | 42 146 (72.6)  |                   | 232 (63.0)                                                     | 123 640 (73.1) |                   |
| Female                                                     | 52 (32.7)                                                     | 31 654 (32.0)  |                   | 962 (38.3)                                                     | 91 114 (31.7)  |                   | 9 (20.9)                                                      | 15 907 (27.4)  |                   | 136 (37.0)                                                     | 45 506 (26.9)  |                   |
| Nationality <sup>d</sup>                                   |                                                               |                | 0.67              |                                                                |                | 0.56              |                                                               |                | 0.63              |                                                                |                | 0.57              |
| Bangladeshi                                                | 7 (4.4)                                                       | 7982 (8.1)     |                   | 101 (4.0)                                                      | 23 618 (8.2)   |                   | 4 (9.3)                                                       | 6487 (11.2)    |                   | 23 (6.3)                                                       | 19 384 (11.5)  |                   |
| Egyptian                                                   | 11 (6.9)                                                      | 6317 (6.4)     |                   | 192 (7.7)                                                      | 18 578 (6.5)   |                   | 3 (7.0)                                                       | 3417 (5.9)     |                   | 40 (10.9)                                                      | 10 087 (6.0)   |                   |
| Filipino                                                   | 6 (3.8)                                                       | 10 453 (10.6)  |                   | 120 (4.8)                                                      | 30 135 (10.5)  |                   | 3 (7.0)                                                       | 7896 (13.6)    |                   | 25 (6.8)                                                       | 22 580 (13.4)  |                   |
| Indian                                                     | 31 (19.5)                                                     | 24 518 (24.8)  |                   | 473 (18.9)                                                     | 72 953 (25.3)  |                   | 17 (39.5)                                                     | 18 409 (31.7)  |                   | 114 (31.0)                                                     | 55 041 (32.5)  |                   |
| Nepalese                                                   | 5 (3.1)                                                       | 8136 (8.2)     |                   | 79 (3.2)                                                       | 23 938 (8.3)   |                   | 2 (4.7)                                                       | 5801 (10.0)    |                   | 12 (3.3)                                                       | 17 214 (10.2)  |                   |
| Pakistani                                                  | 5 (3.1)                                                       | 4105 (4.1)     |                   | 112 (4.5)                                                      | 11 963 (4.2)   |                   | 4 (9.3)                                                       | 3160 (5.4)     |                   | 21 (5.7)                                                       | 9153 (5.4)     |                   |
| Qatari                                                     | 70 (44.0)                                                     | 16 868 (17.0)  |                   | 907 (36.2)                                                     | 49 381 (17.2)  |                   | 2 (4.7)                                                       | 1637 (2.8)     |                   | 36 (9.8)                                                       | 4669 (2.8)     |                   |
| Sri Lankan                                                 | 3 (1.9)                                                       | 2968 (3.0)     |                   | 39 (1.6)                                                       | 8780 (3.1)     |                   | 5 (11.6)                                                      | 2546 (4.4)     |                   | 14 (3.8)                                                       | 7579 (4.5)     |                   |
| Sudanese                                                   | 3 (1.9)                                                       | 2519 (2.5)     |                   | 49 (2.0)                                                       | 7222 (2.5)     |                   | 2 (4.7)                                                       | 1327 (2.3)     |                   | 10 (2.7)                                                       | 3767 (2.2)     |                   |
| Other nationalities <sup>e</sup>                           | 18 (11.3)                                                     | 15 201 (15.3)  |                   | 437 (17.4)                                                     | 41 355 (14.4)  |                   | 1 (2.3)                                                       | 7373 (12.7)    |                   | 73 (19.8)                                                      | 19 672 (11.6)  |                   |
| Calendar month of Dose 1                                   |                                                               |                | 0.78              |                                                                |                | 1.01              |                                                               |                | 0.87              |                                                                |                | 1.00              |
| December                                                   | 1 (0.6)                                                       | 202 (0.2)      |                   | 18 (0.7)                                                       | 549 (0.2)      |                   | 0 (0.0)                                                       | 0 (0.0)        |                   | 0 (0.0)                                                        | 0 (0.0)        |                   |
| January                                                    | 12 (7.6)                                                      | 3015 (3.0)     |                   | 331 (13.2)                                                     | 8372 (2.9)     |                   | 0 (0.0)                                                       | 0 (0.0)        |                   | 0 (0.0)                                                        | 0 (0.0)        |                   |
| February                                                   | 44 (27.7)                                                     | 9485 (9.6)     |                   | 754 (30.1)                                                     | 27 127 (9.4)   |                   | 0 (0.0)                                                       | 80 (0.1)       |                   | 1 (0.3)                                                        | 178 (0.1)      |                   |
| March                                                      | 43 (27.0)                                                     | 17 564 (17.7)  |                   | 717 (28.6)                                                     | 51 798 (18.0)  |                   | 12 (27.9)                                                     | 8206 (14.1)    |                   | 142 (38.6)                                                     | 24 369 (14.4)  |                   |
| April                                                      | 19 (12.0)                                                     | 19 792 (20.0)  |                   | 287 (11.4)                                                     | 58 506 (20.3)  |                   | 22 (51.2)                                                     | 16 357 (28.2)  |                   | 161 (43.8)                                                     | 48 265 (28.5)  |                   |
| May                                                        | 35 (22.0)                                                     | 33 322 (33.6)  |                   | 329 (13.1)                                                     | 96 596 (33.6)  |                   | 6 (14.0)                                                      | 14 607 (25.2)  |                   | 48 (13.0)                                                      | 42 265 (25.0)  |                   |
| June                                                       | 5 (3.1)                                                       | 10 062 (10.2)  |                   | 62 (2.5)                                                       | 29 340 (10.2)  |                   | 2 (4.7)                                                       | 7713 (13.3)    |                   | 12 (3.3)                                                       | 22 134 (13.1)  |                   |
| July                                                       | 0 (0.0)                                                       | 4216 (4.3)     |                   | 10 (0.4)                                                       | 11 738 (4.1)   |                   | 1 (2.3)                                                       | 8964 (15.4)    |                   | 4 (1.1)                                                        | 25 569 (15.1)  |                   |
| August                                                     | 0 (0.0)                                                       | 1409 (1.4)     |                   | 1 (0.04)                                                       | 3897 (1.4)     |                   | 0 (0.0)                                                       | 2126 (3.7)     |                   | 0 (0.0)                                                        | 6366 (3.8)     |                   |

Abbreviations: IQR, interquartile range; SMD, standardized mean difference.

<sup>a</sup>Cohorts of individuals with prior PCR-confirmed infection and with no prior PCR-confirmed infection were exact matched in a 1:3 ratio by sex, 5-year age group, nationality, and calendar week of first vaccine dose.

<sup>b</sup>SMD is the difference in the mean of a covariate between groups divided by the pooled standard deviation. An SMD less than 0.1 indicates adequate matching.

<sup>c</sup>SMD reported here is for the mean difference between groups divided by the pooled standard deviation.

<sup>d</sup>Nationalities were chosen to represent the most numerous groups in the population of Qatar.

<sup>e</sup>Individuals who received the BNT162b2 vaccine comprised 8 other nationalities in individuals with a prior PCR-confirmed infection who were reinfected, 102 other nationalities in individuals with a prior PCR-confirmed infection who were not infected, 34 other nationalities in individuals with no prior PCR-confirmed infection who were infected, and 103 other nationalities in individuals with no prior PCR-confirmed infection who were not infected. Meanwhile, individuals who received the mRNA-1273 vaccine comprised 1 other nationality in individuals with a prior PCR-confirmed infection who were reinfected, 85 other nationalities in individuals with a prior PCR-confirmed infection who were not infected, 23 other nationalities in individuals with no prior PCR-confirmed infection who were infected, and 87 other nationalities in individuals with no prior PCR-confirmed infection who were not infected.

eFigure 1. Time trend of A) cumulative numbers of BNT162b2-vaccinated and mRNA-1273-vaccinated persons included in this study, B) numbers of daily diagnosed SARS-CoV-2 infections during the study period.

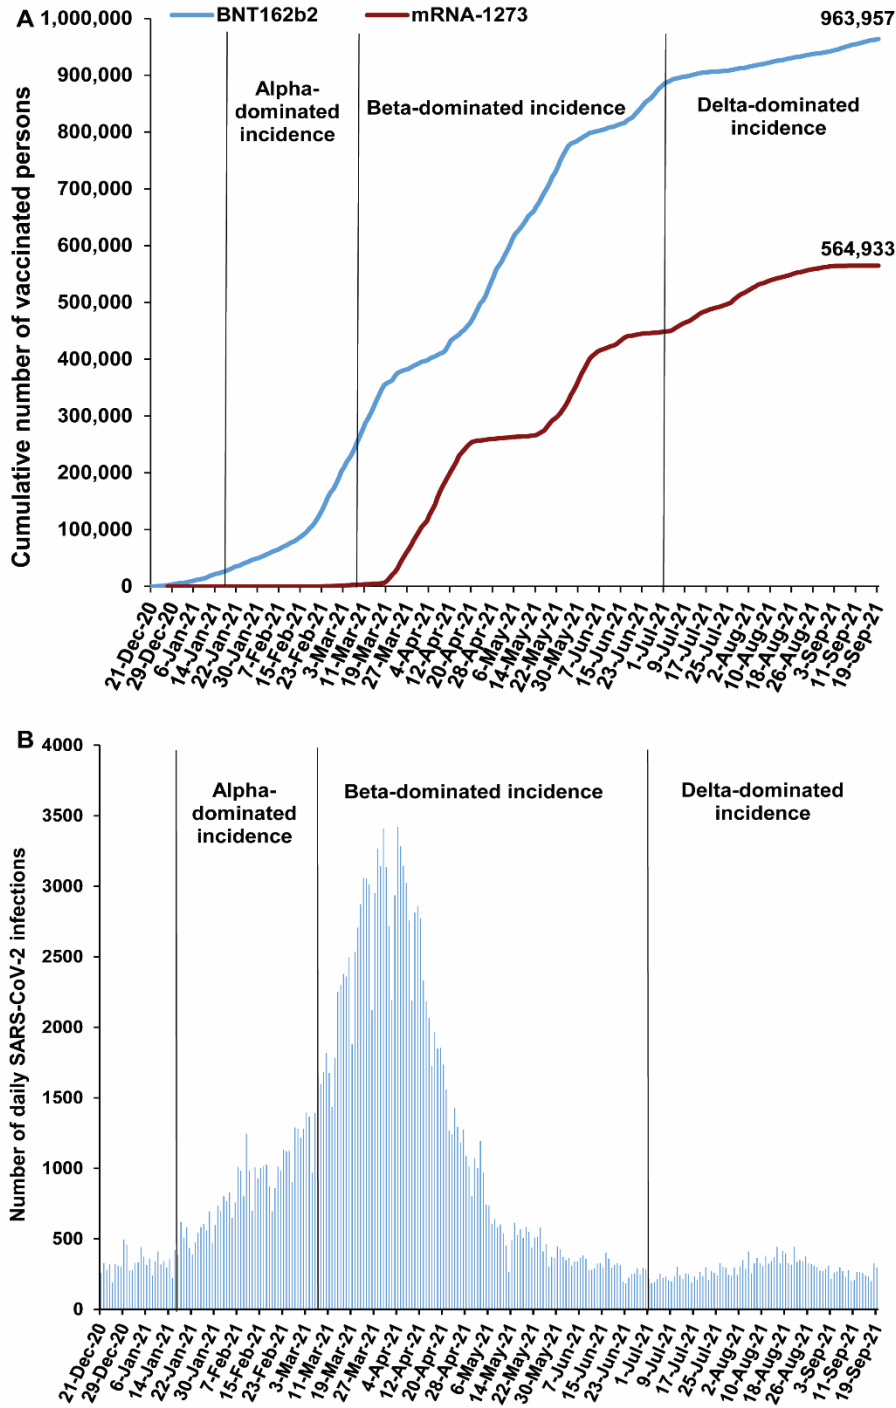



**eFigure 2. Cumulative infection incidence among matched cohorts of BNT162b2- and mRNA-1273-vaccinated individuals with and without a prior infection.**

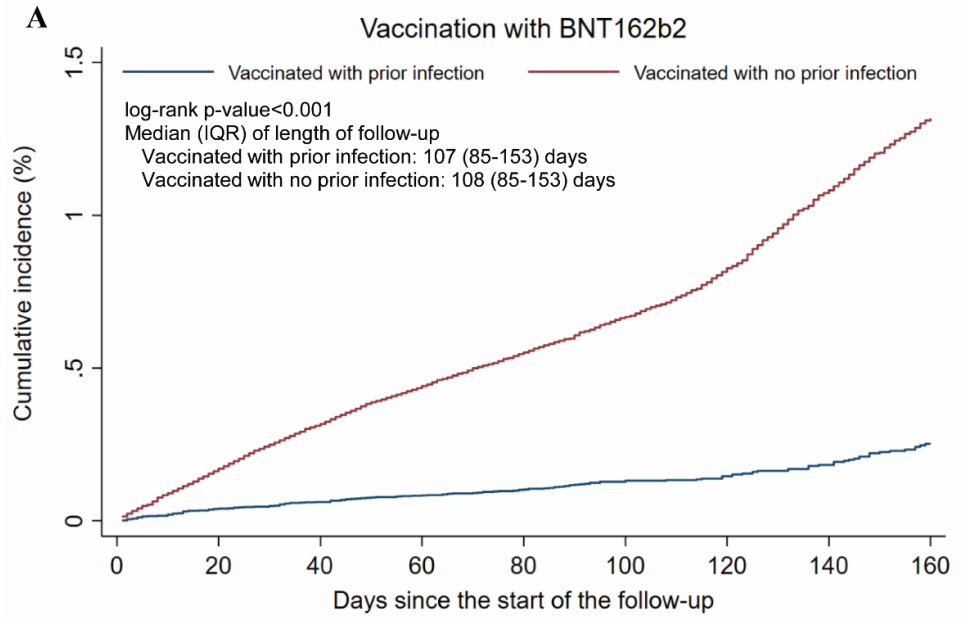

| Time (days)                        | 0       | 20      | 40      | 60      | 80      | 100     | 120     | 140    | 160    |
|------------------------------------|---------|---------|---------|---------|---------|---------|---------|--------|--------|
| <b>No. at risk</b>                 |         |         |         |         |         |         |         |        |        |
| Vaccinated with prior infection    | 99 226  | 96 960  | 93 683  | 85 593  | 80 822  | 58 258  | 36 385  | 29 650 | 19 138 |
| Vaccinated with no prior infection | 290 432 | 283 910 | 274 588 | 250 489 | 235 076 | 171 177 | 106 093 | 86 337 | 55 266 |

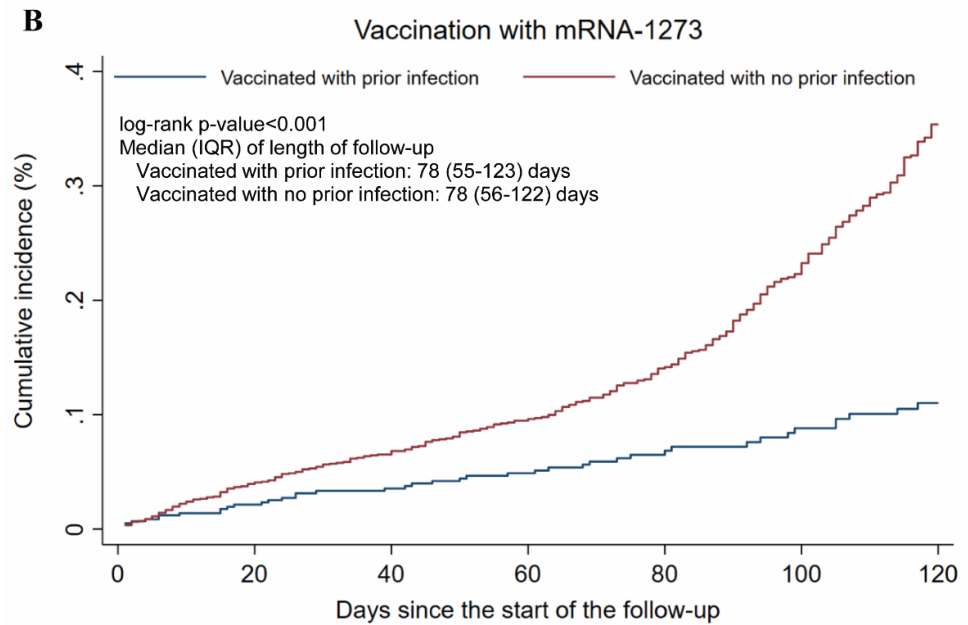

| Time (days)                        | 0       | 20      | 40      | 60      | 80     | 100    | 120    |
|------------------------------------|---------|---------|---------|---------|--------|--------|--------|
| <b>No. at risk</b>                 |         |         |         |         |        |        |        |
| Vaccinated with prior infection    | 58 096  | 52 179  | 46 579  | 41 902  | 28 551 | 24 541 | 16 492 |
| Vaccinated with no prior infection | 169 514 | 152 478 | 136 504 | 127 722 | 82 960 | 72 662 | 49 144 |

**eFigure 3. Development of cohorts with prior infections  $\geq 6$  months versus  $< 6$  months before the first vaccine dose in a study of SARS-CoV-2 infections after vaccination.**

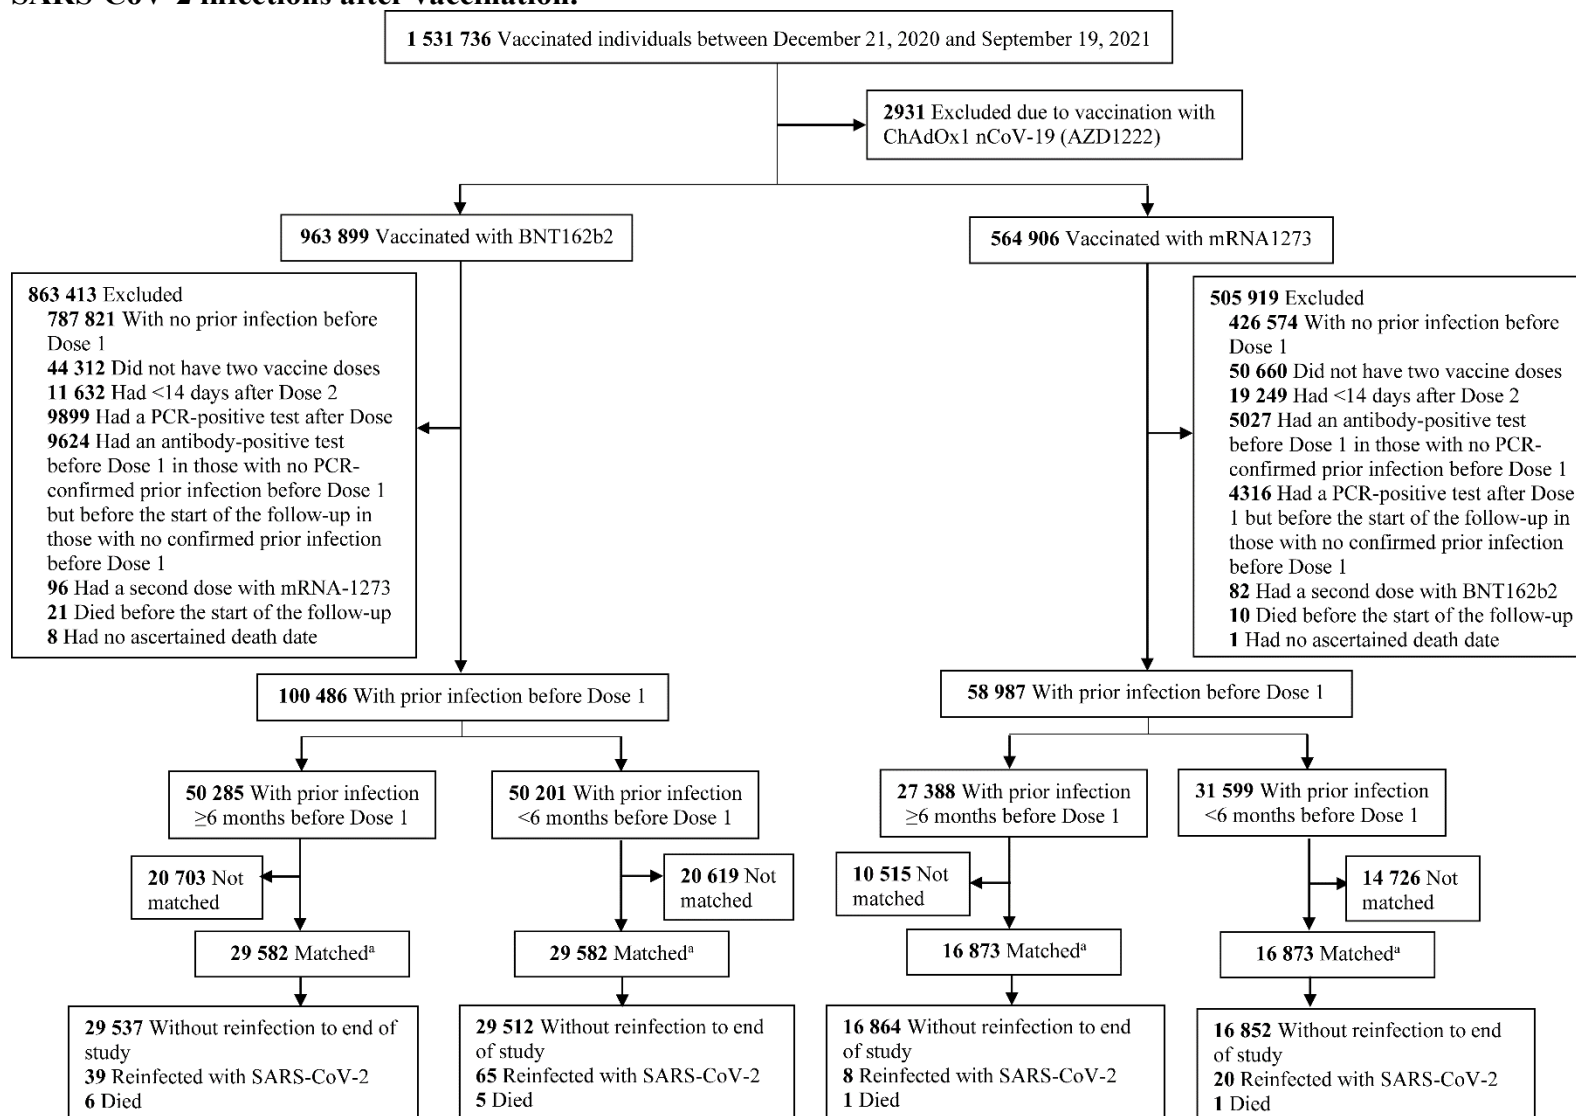

<sup>a</sup>Individuals were exact matched based on infection status on a 1:1 ratio by sex, 5-year age group, nationality, and calendar week of first vaccine dose.

**eFigure 4. Cumulative infection incidence among individuals with a prior infection by time interval between prior infection and vaccination.**

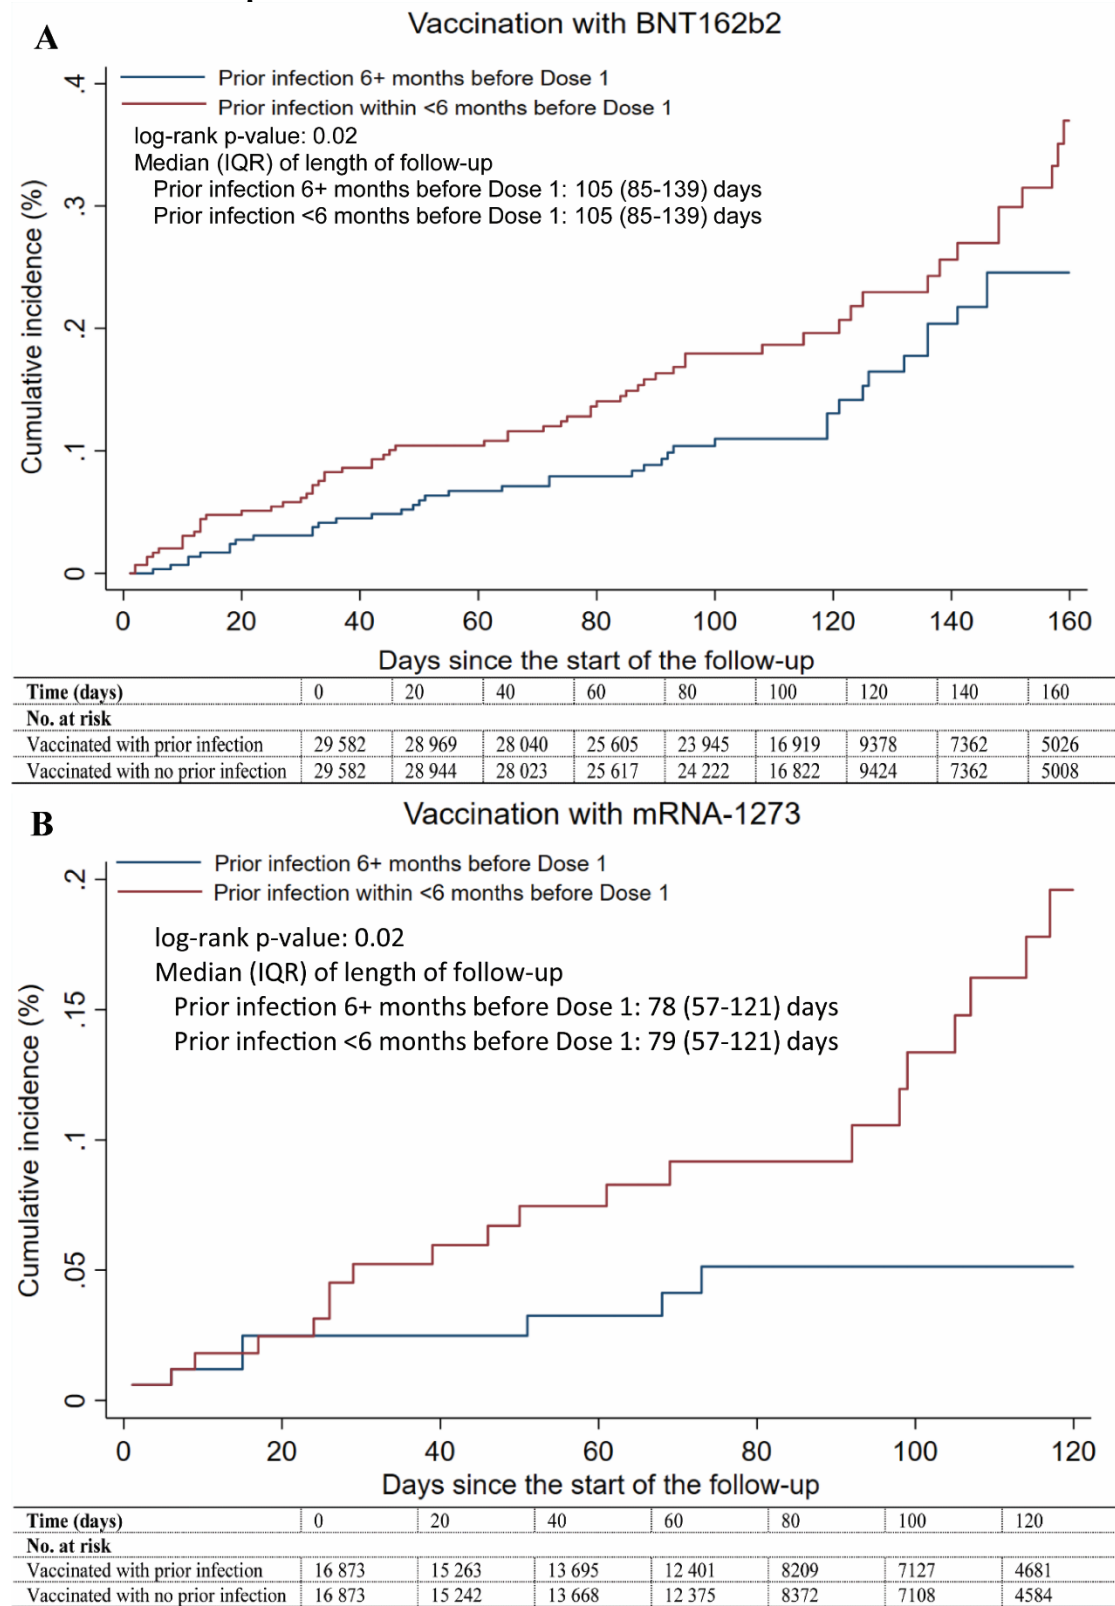

## eReferences

1. World Health Organization. COVID-19 clinical management: living guidance. Available from: <https://www.who.int/publications/i/item/WHO-2019-nCoV-clinical-2021-1>. Accessed on: May 15 2021. 2021.
2. World Health Organization. International guidelines for certification and classification (coding) of COVID-19 as cause of death. Available from: [https://www.who.int/classifications/icd/Guidelines\\_Cause\\_of\\_Death\\_COVID-19-20200420-EN.pdf?ua=1](https://www.who.int/classifications/icd/Guidelines_Cause_of_Death_COVID-19-20200420-EN.pdf?ua=1). Document Number: WHO/HQ/DDI/DNA/CAT. Accessed on May 31, 2021. 2021.
3. Vogels C, Fauver J, Grubaugh N. Multiplexed RT-qPCR to screen for SARS-CoV-2 B.1.1.7, B.1.351, and P.1 variants of concern V.3. [dx.doi.org/10.17504/protocols.io.br9vm966](https://www.protocols.io/view/multiplexed-rt-qpcr-to-screen-for-sars-cov-2-b-1-1-1-br9vm966). <https://www.protocols.io/view/multiplexed-rt-qpcr-to-screen-for-sars-cov-2-b-1-1-1-br9vm966>. Published 2021. Accessed June 6, 2021.
4. Abu-Raddad LJ, Chemaitelly H, Butt AA, National Study Group for Covid-19 Vaccination. Effectiveness of the BNT162b2 Covid-19 Vaccine against the B.1.1.7 and B.1.351 Variants. *N Engl J Med*. 2021.
5. Chemaitelly H, Yassine HM, Benslimane FM, et al. mRNA-1273 COVID-19 vaccine effectiveness against the B.1.1.7 and B.1.351 variants and severe COVID-19 disease in Qatar. *Nat Med*. 2021.
6. National Project of Surveillance for Variants of Concern and Viral Genome Sequencing. Qatar viral genome sequencing data. Data on randomly collected samples. <https://www.gisaid.org/phylogenetics/global/nextstrain/>. <https://www.gisaid.org/phylogenetics/global/nextstrain/>. Published 2021. Accessed.
7. Benslimane FM, Al Khatib HA, Al-Jamal O, et al. One year of SARS-CoV-2: Genomic characterization of COVID-19 outbreak in Qatar. *medRxiv*. 2021:2021.2005.2019.21257433.
8. Hasan MR, Kalikiri MKR, Mirza F, et al. Real-Time SARS-CoV-2 Genotyping by High-Throughput Multiplex PCR Reveals the Epidemiology of the Variants of Concern in Qatar. *Int J Infect Dis*. 2021.
9. Saththasivam J, El-Malah SS, Gomez TA, et al. COVID-19 (SARS-CoV-2) outbreak monitoring using wastewater-based epidemiology in Qatar. *Sci Total Environ*. 2021;774:145608.
